# Supplementary material for: Expansion of Telehealth Availability for Mental Health Care After State-Level Policy Changes From 2019 to 2022
Source: PubMed Central journal article supplement (PMC10265313; doi:10.1001/jamanetworkopen.2023.18045), 2023-06-13
Supplement: jamanetwopen-e2318045-s001.pdf [file jamanetwopen-e2318045-s001.pdf]

## Supplemental Online Content

McBain RK, Schuler MS, Qureshi N, et al. Expansion of telehealth availability for mental health care after state-level policy changes from 2019 to 2022. *JAMA Network Open*. 2023;6(6):e2318045. doi:10.1001/jamanetworkopen.2023.18045

**eAppendix 1.** Telehealth State Policy Start Dates

**eAppendix 2.** Assessing Differential Time Trends in Telehealth Availability by Rurality and Race/Ethnicity

**eAppendix 3.** Assessing Differential Associations Between State Policy and Telehealth Availability by Rurality and Race/Ethnicity

**eAppendix 4.** Predictive Margins Assessing Differential Associations Between State Policy and Telehealth Availability by Rurality and Race/Ethnicity

This supplemental material has been provided by the authors to give readers additional information about their work.

## eAppendix 1. Telehealth State Policy Start Dates

| <i>US State</i>      | <i>Payment Parity</i> | <i>Audio-Only Authorization</i> | <i>IMLC<sup>a</sup> Compact</i> | <i>PSYPACT<sup>b</sup> Compact</i> |
|----------------------|-----------------------|---------------------------------|---------------------------------|------------------------------------|
| Alabama              | na <sup>c</sup>       | na                              | 5/19/15                         | 3/18/21                            |
| Alaska               | na                    | 7/14/22                         | na                              | na                                 |
| Arizona              | 3/25/20               | 3/25/20                         | 5/11/16                         | 5/17/16                            |
| Arkansas             | 1/1/18                | 3/27/20                         | na                              | 4/25/21                            |
| California           | 3/1/20                | 4/30/20                         | na                              | na                                 |
| Colorado             | 1/1/17                | 4/30/20                         | 6/8/16                          | 4/12/18                            |
| Connecticut          | 6/8/21                | 6/8/21                          | 5/13/22                         | 5/24/22                            |
| Delaware             | 7/7/15                | na                              | 6/23/21                         | 6/27/19                            |
| District of Columbia | na                    | 3/19/20                         | 3/7/17                          | 3/16/21                            |
| Florida              | na                    | na                              | na                              | na                                 |
| Georgia              | 1/1/20                | 5/4/2021                        | 9/16/21                         | 4/23/19                            |
| Hawaii               | 12/31/16              | na                              | na                              | na                                 |
| Idaho                | na                    | na                              | 3/25/15                         | 3/23/22                            |
| Illinois             | 3/19/20               | 3/19/20                         | 7/21/15                         | 8/22/18                            |
| Indiana              | na                    | 3/6/20                          | 3/10/22                         | 3/10/22                            |
| Iowa                 | 1/1/21                | 9/18/20                         | 7/2/15                          | na                                 |
| Kansas               | na                    | na                              | 5/13/16                         | 5/17/21                            |
| Kentucky             | 1/1/22                | 3/11/20                         | 12/13/18                        | 3/18/21                            |
| Louisiana            | 1/1/21                | 3/17/20                         | 7/1/21                          | na                                 |
| Maine                | na                    | 3/16/20                         | 4/6/17                          | 6/22/21                            |
| Maryland             | 7/1/21                | 4/3/20                          | 1/19/18                         | 5/18/21                            |
| Massachusetts        | 1/1/21                | 4/1/20                          | na                              | na                                 |
| Michigan             | na                    | 3/20/20                         | 6/1/19                          | na                                 |
| Minnesota            | 1/1/17                | 12/14/20                        | 5/19/15                         | 5/25/21                            |
| Mississippi          | na                    | na                              | 5/17/16                         | na                                 |
| Missouri             | na                    | 3/8/22                          | na                              | 6/1/18                             |
| Montana              | na                    | na                              | 4/8/15                          | na                                 |
| Nebraska             | 4/21/21               | na                              | 1/5/17                          | 4/23/18                            |
| Nevada               | 10/1/21               | 6/4/21                          | 5/27/15                         | 5/26/17                            |
| New Hampshire        | 7/21/20               | 7/21/22                         | 5/5/16                          | 7/10/19                            |
| New Jersey           | 3/20/20               | na                              | 1/10/22                         | 9/24/21                            |
| New Mexico           | 4/4/19                | 3/18/20                         | na                              | na                                 |
| New York             | 1/1/16                | 6/17/20                         | na                              | na                                 |
| North Carolina       | na                    | 4/24/20                         | na                              | 7/1/20                             |
| North Dakota         | na                    | 3/25/20                         | 1/15/19                         | na                                 |
| Ohio                 | na                    | 3/20/20                         | 7/1/21                          | 4/27/21                            |
| Oklahoma             | 1/1/22                | na                              | 1/18/19                         | 4/29/19                            |
| Oregon               | 6/1/21                | 4/6/20                          | na                              | na                                 |
| Pennsylvania         | na                    | 4/20/20                         | 10/26/16                        | 5/8/20                             |
| Rhode Island         | 3/18/20               | na                              | 6/29/22                         | 1/1/23                             |
| South Carolina       | na                    | 3/19/20                         | na                              | na                                 |
| South Dakota         | na                    | 8/22/21                         | 3/12/15                         | na                                 |
| Tennessee            | na                    | 3/25/20                         | 2/9/17                          | 5/11/21                            |
| Texas                | na                    | 3/17/20                         | 6/7/21                          | 6/10/19                            |
| Utah                 | 3/22/21               | 3/25/20                         | 3/20/15                         | 3/17/17                            |
| Vermont              | 3/16/20               | na                              | 12/21/17                        | na                                 |
| Virginia             | na                    | 3/19/20                         | na                              | 4/11/20                            |
| Washington           | 1/1/21                | 5/3/21                          | 1/17/17                         | 3/4/22                             |
| West Virginia        | 7/1/21                | na                              | 3/31/15                         | 4/21/21                            |
| Wisconsin            | na                    | 3/1/20                          | 12/14/15                        | 2/4/22                             |
| Wyoming              | na                    | na                              | 2/27/15                         | na                                 |

<sup>a</sup> IMLC: Interstate Medical Licensure Compact. <sup>b</sup> PSYPACT: Psychology Interjurisdictional Compact. <sup>c</sup> CMHC: Community Mental Health Center.

## eAppendix 2. Assessing Differential Time Trends in Telehealth Availability by Rurality and Race/Ethnicity

|                                 | Omnibus chi-square p-value |
|---------------------------------|----------------------------|
| Interaction term                |                            |
| (Rural) X (Year)                | <0.001                     |
| (% Black Residents) x (Year)    | 0.05                       |
| (% Hispanic Residents) x (Year) | 0.18                       |

**Note:** Differential time trends were tested in a single regression model that included interaction terms for (Rural) X (Year), (% Black Residents) x (Year), and (% Hispanic Residents) x (Year). Year was treated as a categorical variable; % Black Residents and % Hispanic Residents were coded as four-level categorical variables, as in primary analyses. The regression model included state and year fixed effects and standard errors clustered at the facility level. Differential time trends were tested using an omnibus chi-square test for each interaction term. A statistically significant omnibus test indicated the presence of differential time trends across groups.

**eAppendix 3.** Assessing Differential Associations Between State Policy and Telehealth Availability by Rurality and Race/Ethnicity

|                                    | Omnibus chi-square p-value |                                 |                     |                        |
|------------------------------------|----------------------------|---------------------------------|---------------------|------------------------|
|                                    | <i>Payment Parity</i>      | <i>Audio-Only Authorization</i> | <i>IMLC Compact</i> | <i>PSYPACT Compact</i> |
| Interaction term                   |                            |                                 |                     |                        |
| (% Black Residents ) x (Policy)    | <0.001                     | <0.001                          | 0.31                | 0.91                   |
| (% Hispanic Residents ) x (Policy) | 0.15                       | 0.01                            | 0.07                | 0.09                   |
| (Rural) x (Policy)                 | 0.02                       | <0.001                          | 0.02                | 0.30                   |

**Note:** For each policy, we estimated three separate regression models to assess (Rural) X (Policy), (% Black Residents) x (Policy), and (% Hispanic Residents) x (Policy), respectively. % Black Residents and % Hispanic Residents were coded as four-level categorical variables, as in primary analyses. Regression models included state and year fixed effects and standard errors clustered at the facility level. Heterogeneity regarding policy association was tested using an omnibus chi-square test for the given interaction term. A statistically significant omnibus test indicated the presence of differential policy associations across groups.

**eAppendix 4.** Predictive Margins Assessing Differential Associations Between State Policy and Telehealth Availability by Rurality and Race/Ethnicity

**I. PAYMENT PARITY**

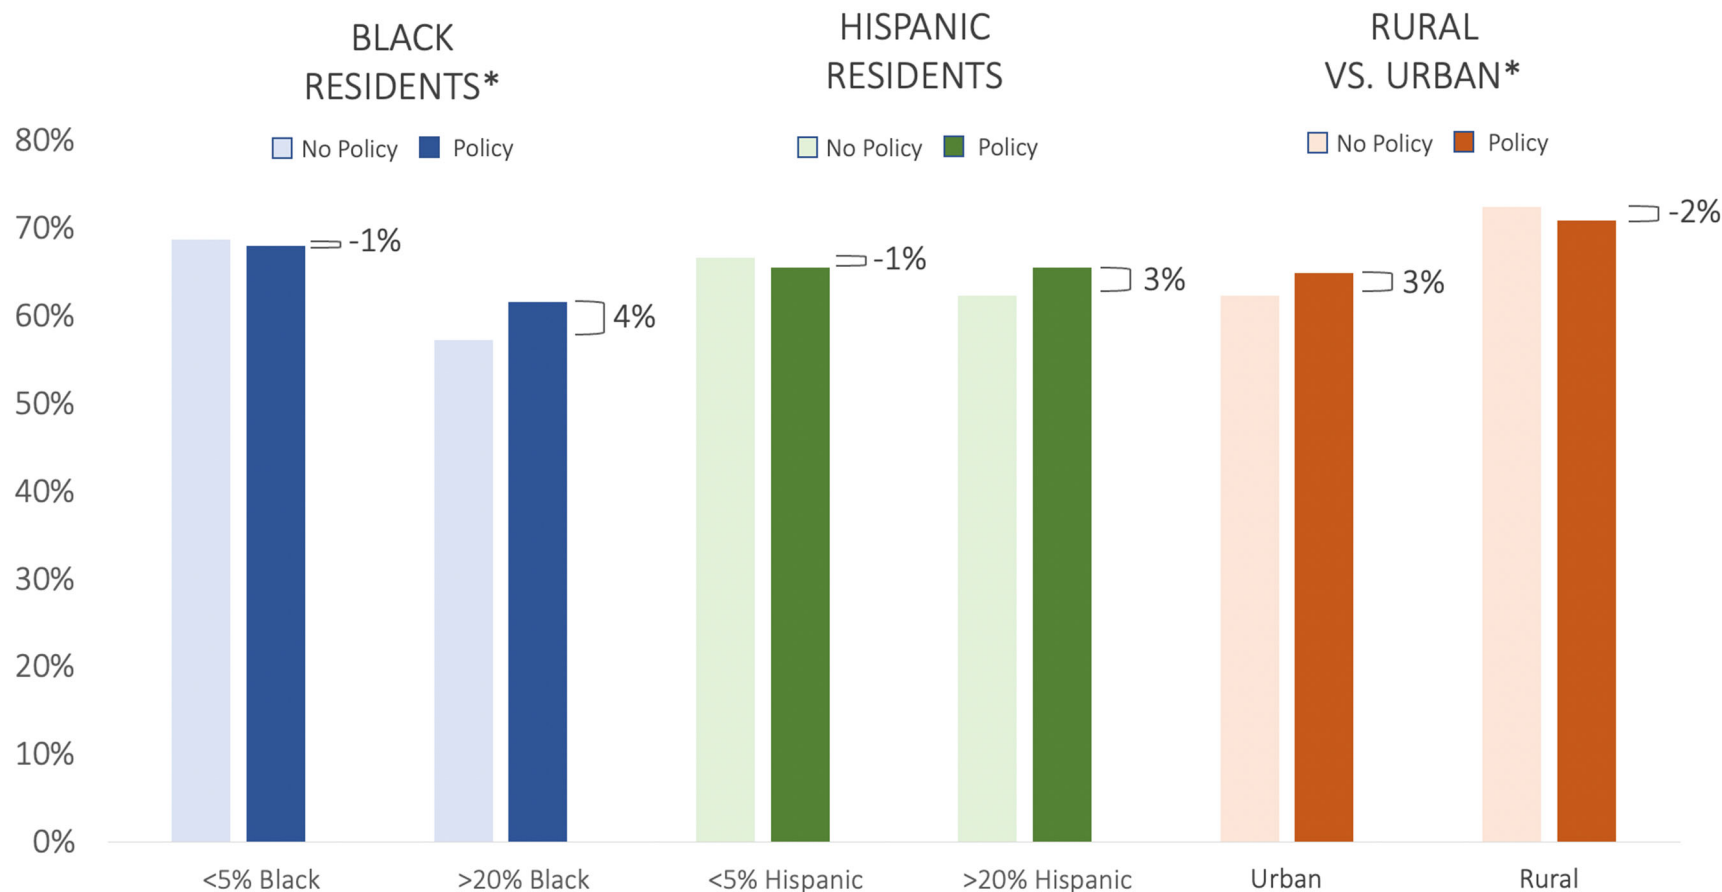

**Note:** Predictive margins were generated from regression models described in Appendix III. Asterisks (\*) denote significant ( $p < 0.05$ ) differential effects according to omnibus chi-square tests: the relationship between policy implementation and telehealth availability was greater in some communities (e.g., communities that

were >20% Black) compared to others (e.g., communities that were <5% Black). Middle categories for % Black and % Hispanic were suppressed for parsimony in this presentation.

## II. AUDIO-ONLY AUTHORIZATION

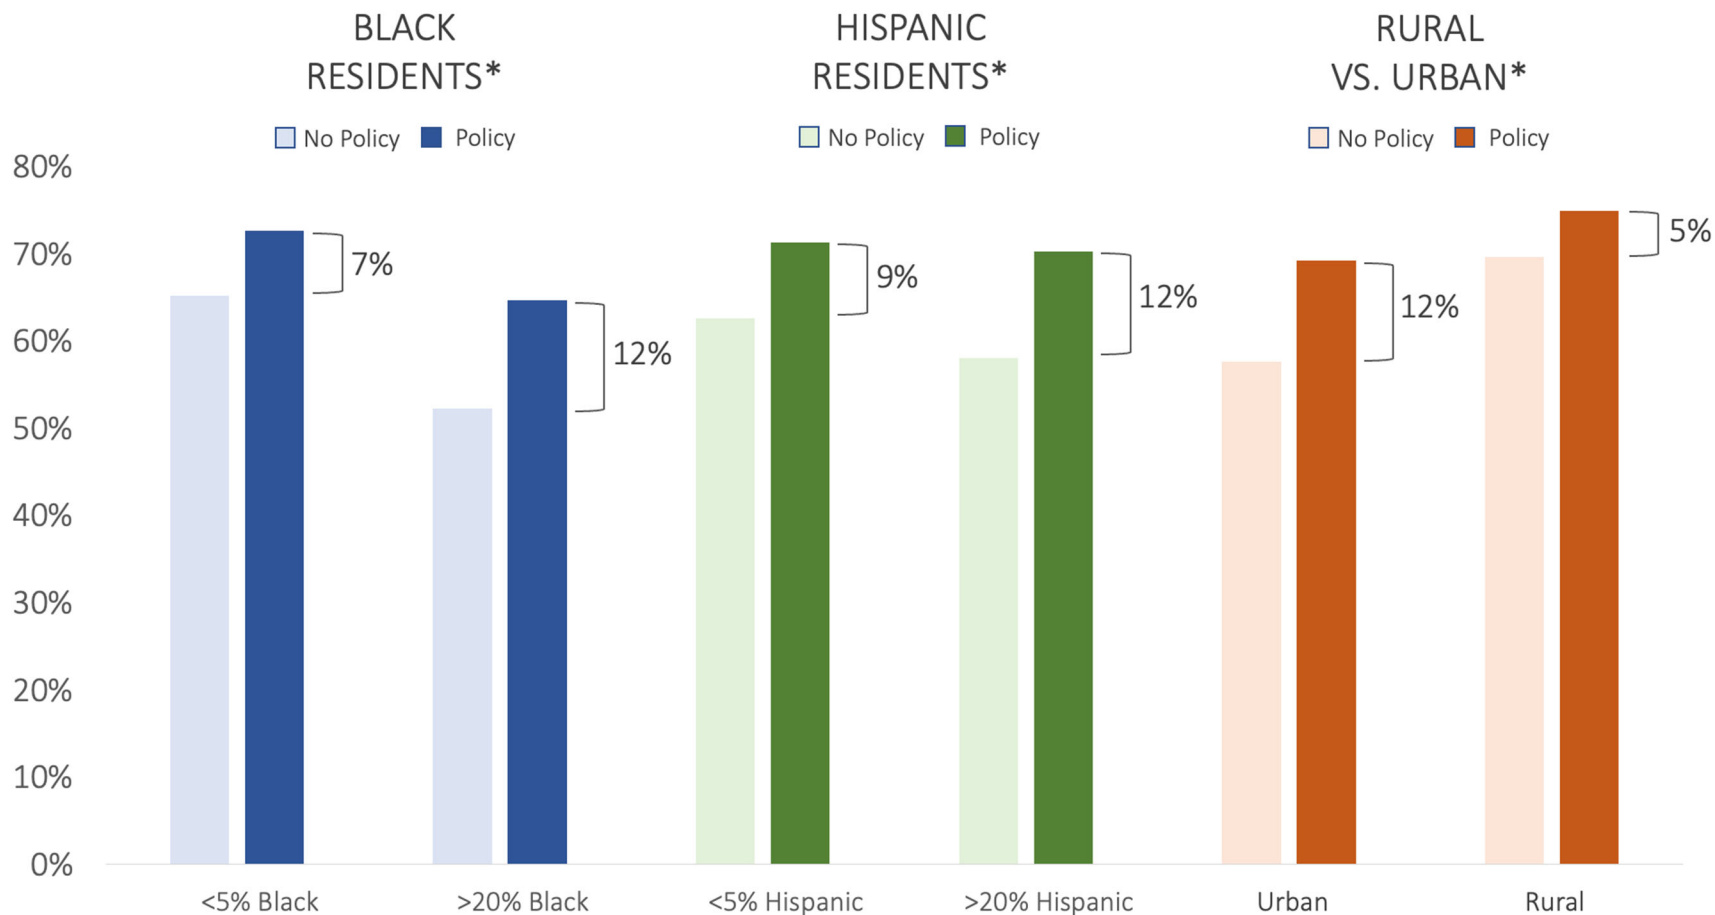

**Note:** Predictive margins were generated from regression models described in Appendix III. Asterisks (\*) denote significant ( $p < 0.05$ ) differential effects according to omnibus chi-square tests: the relationship between policy implementation and telehealth availability was greater in some communities (e.g., communities that

were >20% Black) compared to others (e.g., communities that were <5% Black). Middle categories for % Black and % Hispanic were suppressed for parsimony in this presentation.

### III. IMLC COMPACT

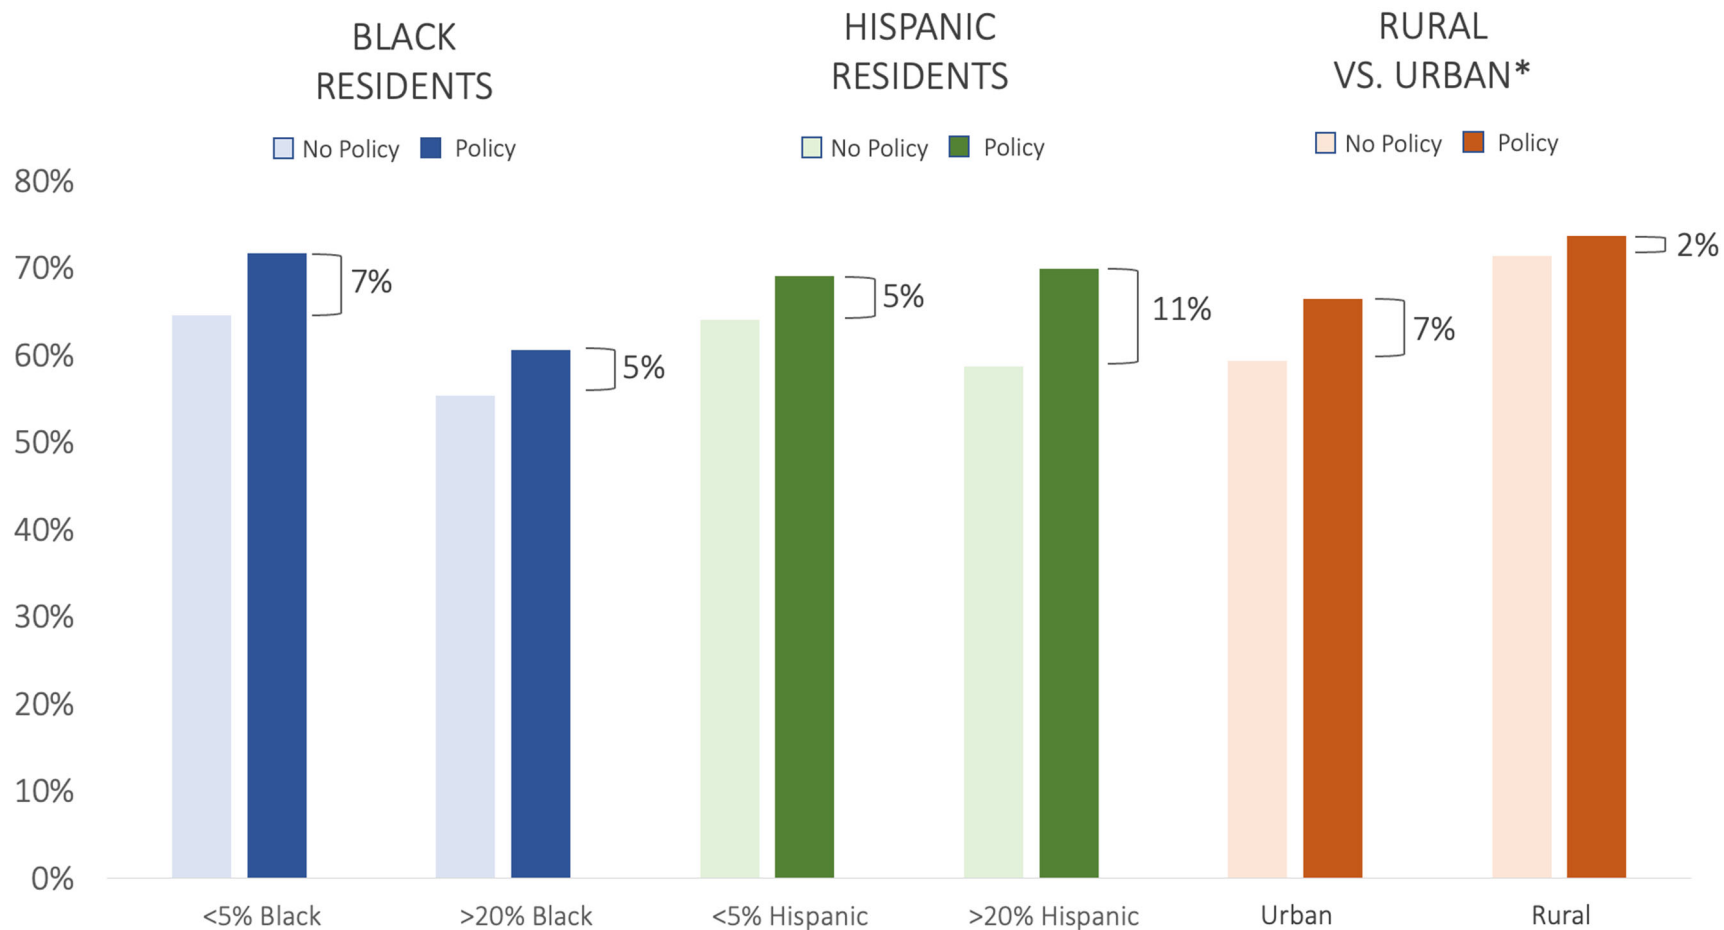

**Note:** Predictive margins were generated from regression models described in Appendix III. Asterisks (\*) denote significant ( $p < 0.05$ ) differential effects according to omnibus chi-square tests: the relationship between policy implementation and telehealth availability was greater in some communities (e.g., communities that were urban) compared to others (e.g., communities that were rural). Middle categories for % Black and % Hispanic were suppressed for parsimony in this presentation.

#### IV. PSYPACT COMPACT

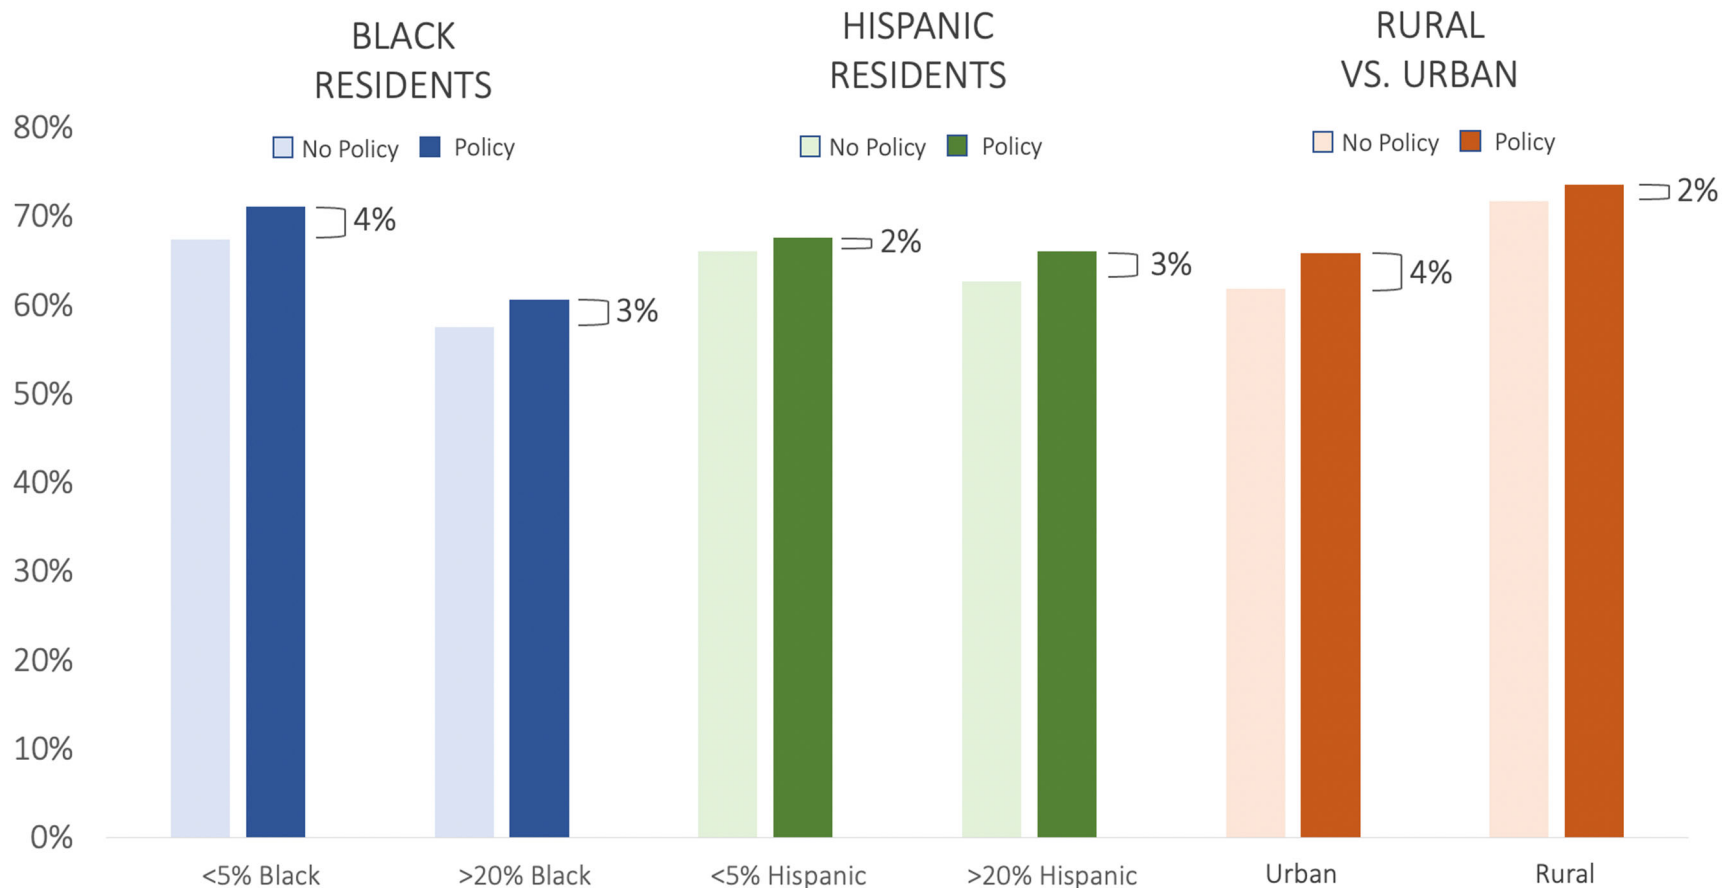



**Note:** Predictive margins were generated from regression models described in Appendix III. Asterisks (\*) denote significant ( $p < 0.05$ ) differential effects according to omnibus chi-square tests: the relationship between policy implementation and telehealth availability was greater in some communities (e.g., communities that were >20% Black) compared to others (e.g., communities that were <5% Black). Middle categories for % Black and % Hispanic were suppressed for parsimony in this presentation.
