# Supplementary material for: Expansion of Telehealth Availability for Mental Health Care After State-Level Policy Changes From 2019 to 2022
Source: PubMed Central journal article supplement (PMC10265313; doi:10.1001/jamanetworkopen.2023.18045), 2023-06-13
Supplement: jamanetwopen-e2318045-s002.pdf [file jamanetwopen-e2318045-s002.pdf]

## Data Sharing Statement

McBain. Expansion of Telehealth Availability for Mental Health Care After State-Level Policy Changes From 2019 to 2022. *JAMA Netw Open*. Published June 13, 2023.

doi:10.1001/jamanetworkopen.2023.18045

### Data

**Data available:** No

### Additional Information

**Explanation for why data not available:** Data will be made available upon request from the corresponding author.
